# Supplementary material for: Association of Depression and Poor Mental Health With Cardiovascular Disease and Suboptimal Cardiovascular Health Among Young Adults in the United States
Source: PubMed Central journal article supplement — J Am Heart Assoc. 2023 Jan 23;12(3):e028332. doi: 10.1161/JAHA.122.028332 (PMC9973664; doi:10.1161/jaha.122.028332), 2023-01-23
Supplement: JAH3-12-e028332-s001.pdf [file JAH3-12-e028332-s001.pdf]

## **SUPPLEMENTAL MATERIAL**

**Table S1. Characteristics of Study Participants Stratified by Cardiovascular Health Status, Behavioral Risk Factor Surveillance System (2017, 2019)**

| <b>Characteristics</b>         | <b>Overall<br/>n*=198,680 (weighted %)</b> | <b>Optimal CVH<br/>n=39,391 (weighted %)</b> | <b>Suboptimal CVH<br/>n =159,289 (weighted %)</b> | <b>p-<br/>value</b> |
|--------------------------------|--------------------------------------------|----------------------------------------------|---------------------------------------------------|---------------------|
| <b>Age</b>                     |                                            |                                              |                                                   | <b>&lt;0.001</b>    |
| 18-24                          | 29,383 (21.0)                              | 8,958 (32.1)                                 | 20,425 (18.2)                                     |                     |
| 25-29                          | 25,958 (14.1)                              | 5,588 (14.9)                                 | 20,370 (13.9)                                     |                     |
| 30-34                          | 30,632 (17.3)                              | 5,938 (16.4)                                 | 24,694 (17.6)                                     |                     |
| 35-39                          | 34,821 (15.9)                              | 6,420 (13.7)                                 | 28,401 (16.4)                                     |                     |
| 40-44                          | 35,710 (16.4)                              | 6,109 (12.5)                                 | 29,601 (17.4)                                     |                     |
| 45-49                          | 42,176 (15.3)                              | 6,378 (10.4)                                 | 35,798 (15.5)                                     |                     |
| <b>Sex</b>                     |                                            |                                              |                                                   | <b>&lt;0.001</b>    |
| Male                           | 96,582 (49.2)                              | 15,252 (41.3)                                | 81,330 (53.2)                                     |                     |
| Female                         | 102,090 (50.8)                             | 24,138 (58.7)                                | 77,952 (46.8)                                     |                     |
| <b>Race/ethnicity</b>          |                                            |                                              |                                                   | <b>&lt;0.001</b>    |
| non-Hispanic White             | 135,048 (56.7)                             | 28,806 (62.0)                                | 106,242 (55.4)                                    |                     |
| non-Hispanic Black             | 17,144 (12.2)                              | 2,499 (9.5)                                  | 14,645 (12.9)                                     |                     |
| American Indian/Alaskan Native | 5,233 (1.2)                                | 796 (1.1)                                    | 4,437 (1.2)                                       |                     |
| Asian                          | 7,210 (7.1)                                | 1,489 (7.9)                                  | 5,721 (6.8)                                       |                     |
| Hispanic                       | 27,092 (20.8)                              | 4413(17.4)                                   | 22,679 (21.7)                                     |                     |
| Other                          | 1,143 (0.4)                                | 236 (0.4)                                    | 907 (0.4)                                         |                     |
| Multi-racial                   | 5,810 (1.6)                                | 1,152 (1.7)                                  | 4,658 (1.6)                                       |                     |
| <b>Education level</b>         |                                            |                                              |                                                   | <b>&lt;0.001</b>    |
| <high school                   | 10,591(9.9)                                | 1,026 (5.5)                                  | 9,565 (11.1)                                      |                     |
| High school/some college,      | 103,509(58.5)                              | 17,174 (54.7)                                | 86,335 (59.4)                                     |                     |
| ≥College graduate              | 84,383 (31.6)                              | 21,148 (39.8)                                | 63,235 (29.5)                                     |                     |
| <b>Employment status</b>       |                                            |                                              |                                                   | <b>&lt;0.001</b>    |
| Employed                       | 150,838 (72.9)                             | 29,340 (69.5)                                | 121,498 (73.8)                                    |                     |
| Unemployed                     | 32,253 (16.6)                              | 5,182 (13.1)                                 | 27,071 (17.5)                                     |                     |
| Student                        | 13,619 (10.1)                              | 4,523 (17.2)                                 | 9,096 (8.3)                                       |                     |
| Retired                        | 830 (0.4)                                  | 110 (0.2)                                    | 720 (0.4)                                         |                     |
| <b>Marital status</b>          |                                            |                                              |                                                   | <b>&lt;0.001</b>    |
| Married                        | 98,502 (45.4)                              | 19,807 (42.9)                                | 78,695 (46.0)                                     |                     |
| Divorced                       | 23,746 (9.9)                               | 3,148 (6.5)                                  | 20,598 (10.8)                                     |                     |
| Widowed                        | 1,515 (0.6)                                | 202 (0.4)                                    | 1,313 (0.6)                                       |                     |
| Never married                  | 61,699 (37.0)                              | 13,723 (43.7)                                | 47,976 (35.4)                                     |                     |
| Member of an unmarried couple  | 12,621 (7.1)                               | 2,392 (6.5)                                  | 10,229 (7.2)                                      |                     |
| <b>Healthcare coverage</b>     |                                            |                                              |                                                   | <b>&lt;0.001</b>    |
| No plan                        | 23,317 (14.1)                              | 3,596 (11.5)                                 | 19,721 (14.7)                                     |                     |
| Some form of plan              | 174,504 (85.9)                             | 35,562 (88.5)                                | 138,942 (85.3)                                    |                     |
| <b>Annual family income</b>    |                                            |                                              |                                                   | <b>&lt;0.001</b>    |
| < 100 federal poverty line,    | 25,032 (16.0)                              | 3,445 (11.9)                                 | 21,587 (17.0)                                     |                     |
| Within 100-200% poverty line,  | 33,976 (18.7)                              | 5,440 (15.7)                                 | 28,536 (19.5)                                     |                     |
| >200% federal poverty line     | 121,965 (65.3)                             | 26,877 (72.4)                                | 95,088 (63.5)                                     |                     |
| <b>Depression</b>              |                                            |                                              |                                                   | <b>&lt;0.001</b>    |
| No                             | 154,101 (79.5)                             | 33, 218 (85.2)                               | 120,883 (78.0)                                    |                     |
| Yes                            | 44,579 (20.5)                              | 6,173 (14.8)                                 | 38,406 (22.0)                                     |                     |

CVH-cardiovascular health , \*The numbers represent actual number of participants. All percentages are weighted to reflect final survey weights. p-value <0.05 -significant

**Table S2. Association of Depression and Poor Mental Health with CVD outcomes, Behavioral Risk Factor Surveillance System (2017, 2019), additionally adjusting for hypertension and hypercholesterolemia**

|                                                                                                                                                                                                         | <b>Number of respondents</b> | <b>OR [95% CI]</b> |
|---------------------------------------------------------------------------------------------------------------------------------------------------------------------------------------------------------|------------------------------|--------------------|
| <b>Depression</b>                                                                                                                                                                                       |                              |                    |
| No                                                                                                                                                                                                      | 232,136                      | Ref                |
| Yes                                                                                                                                                                                                     | 63,836                       | 1.92 [1.71 – 2.16] |
| <b>Poor Mental Health Days</b>                                                                                                                                                                          |                              |                    |
| 0                                                                                                                                                                                                       | 161,767                      | Ref                |
| 1-13                                                                                                                                                                                                    | 86,993                       | 1.30 [1.13 – 1.49] |
| 14-30                                                                                                                                                                                                   | 43,270                       | 1.98 [1.73 – 2.26] |
| Model adjusted for age, sex, race, education, employment, income, marital status, healthcare coverage, combustible cigarette smoking, body mass index, diabetes, hypertension, and hypercholesterolemia |                              |                    |

CVD-cardiovascular disease, OR-odds ratio, CI- confidence interval

**Table S3. Association of Depression and Poor Mental Health with CVD outcomes, Stratified by Sex, Behavioral Risk Factor Surveillance System (2017 – 2020)**

|                                                                                                         | Male                   |                       | Female                 |                        |
|---------------------------------------------------------------------------------------------------------|------------------------|-----------------------|------------------------|------------------------|
|                                                                                                         | Model 1<br>OR [95% CI] | Model 2<br>OR [95%CI] | Model 1<br>OR [95% CI] | Model 2<br>OR [95% CI] |
| <b>Depression</b>                                                                                       |                        |                       |                        |                        |
| No                                                                                                      | Ref                    | Ref                   | Ref                    | Ref                    |
| Yes                                                                                                     | 2.80 [2.53 – 3.11]     | 2.40 [2.15 – 2.68]    | 2.57 [2.30 – 2.87]     | 2.20 [1.95 – 2.48]     |
| <b>Poor Mental Health Days</b>                                                                          |                        |                       |                        |                        |
| 0                                                                                                       | Ref                    | Ref                   | Ref                    | Ref                    |
| 1-13                                                                                                    | 1.65 [1.47 – 1.87]     | 1.57 [1.38 – 1.79]    | 1.53 [1.34– 1.76]      | 1.39 [1.21 – 1.60]     |
| 14-30                                                                                                   | 2.56 [2.26 – 2.90]     | 2.25 [1.97 – 2.58]    | 2.80 [2.47 – 3.18]     | 2.31 [2.03 – 2.63]     |
| Model 1: adjusted for age, race, education, employment, income, marital status, and healthcare coverage |                        |                       |                        |                        |
| Model 2: Model 1 + combustible cigarette smoking, body mass index and diabetes,                         |                        |                       |                        |                        |
| Interaction by sex not significant                                                                      |                        |                       |                        |                        |

CVD-cardiovascular disease, OR-odds ratio, CI- confidence interval

**Table S4. Association of Depression and Poor Mental Health with CVD outcomes, Stratified by Urban/Rural Status, Behavioral Risk Factor Surveillance System (2017 – 2020)**

|                                                                                                              | Urban                  |                        | Rural                  |                        |
|--------------------------------------------------------------------------------------------------------------|------------------------|------------------------|------------------------|------------------------|
|                                                                                                              | Model 1<br>OR [95% CI] | Model 2<br>OR [95% CI] | Model 1<br>OR [95% CI] | Model 2<br>OR [95% CI] |
| <b>Depression</b>                                                                                            |                        |                        |                        |                        |
| No                                                                                                           | Ref                    | Ref                    |                        |                        |
| Yes                                                                                                          | 2.69 [2.45– 2.95]      | 2.32 [2.10 – 2.56]     | 2.36 [1.89-2.96]       | 2.03 [1.60-2.59]       |
| <b>Poor Mental Health Days</b>                                                                               |                        |                        |                        |                        |
| 0                                                                                                            | Ref                    | Ref                    |                        |                        |
| 1-13                                                                                                         | 1.63 [1.46– 1.82]      | 1.50 [1.34 – 1.68]     | 1.78 [1.23-2.57]       | 1.72 [1.16-2.54]       |
| 14-30                                                                                                        | 2.72 [2.44 – 3.03]     | 2.26 [2.01– 2.54]      | 2.87 [2.22-3.70]       | 2.50 [1.91-3.27]       |
| Model 1: adjusted for age, sex, race, education, employment, income, marital status, and healthcare coverage |                        |                        |                        |                        |
| Model 2: Model 1 + combustible cigarette smoking, body mass index and diabetes                               |                        |                        |                        |                        |
| Interaction by urban/rural status not significant                                                            |                        |                        |                        |                        |

CVD-cardiovascular disease, OR-odds ratio, CI- confidence interval
